# Supplementary material for: Recovery From Form-Deprivation Myopia in Chicks Is Dependent Upon the Fullness and Correlated Color Temperature of the Light Spectrum
Source: PubMed Central journal article supplement (PMC8822367; doi:10.1167/iovs.63.2.16), 2022-02-08
Supplement: iovs-63-2-16_s001.pdf [file iovs-63-2-16_s001.pdf]

## Supplemental Material

### Recovery from form-deprivation myopia in chicks is dependent upon the fullness and correlated color temperature of the light spectrum

Arumugam R. Muralidharan PhD<sup>1,2</sup>, Low Wan Yu Shermaine BSc<sup>1</sup>, Lee Yong Chong BVSc<sup>1</sup>, Veluchamy A. Barathi PhD<sup>1,2,3</sup>, Seang-Mei Saw MBBS, PhD<sup>1,2,4</sup>, Dan Milea MD, PhD<sup>1,2,5</sup>, Raymond P. Najjar PhD<sup>1,2,3\*</sup>

<sup>1</sup> Singapore Eye Research Institute, Singapore; <sup>2</sup> Ophthalmology and Visual Sciences Academic Clinical Programme, Duke-NUS Medical School, Singapore; <sup>3</sup> Department of Ophthalmology, Yong Loo Lin School of Medicine, National University of Singapore, Singapore; <sup>4</sup> Saw Swee Hock School of Public Health, National University of Singapore, Singapore; <sup>5</sup> Singapore National Eye Centre, Singapore.

\* Corresponding author

#### **This supplement includes:**

##### **Supplementary Tables:**

**Supplementary Table 1.** Detailed light measurements for experimental groups.

##### **Supplementary Figures:**

**Supplementary Figure S1.** Average weights of animals raised under FL-4000 (n = 18), SL-4000 (n=12) and SL-6500 (n = 9) throughout the experiment.

**Supplementary Figure S2.** Data from fellow control eyes in animals raised under FL 4000 (n=18), SL 4000 (n=12) and SL 6500 (n=9).

**Supplementary Figure S3.** Changes in the retinal thickness in FD and fellow control eyes in animals raised under FL-4000 (n = 18) (A), SL-4000 (n = 12) (B), SL-6500 (n = 9).

##### **Supplementary References**

This supplementary material has been provided by the authors to give readers additional information about their work.

## Supplementary Tables

**Supplementary Table 1.** Detailed light measurements for experimental groups.

|                                                                          | <b>FL-4000</b> | <b>SL-4000</b> | <b>SL-6500</b> |
|--------------------------------------------------------------------------|----------------|----------------|----------------|
| <b>Illuminance (Human Lux)</b>                                           | 281.8          | 284.5          | 287.9          |
| <b>Illuminance (Chick Lux)*</b>                                          | 344.9          | 351.5          | 339.8          |
| <b>Illuminance (Chick Lux)^</b>                                          | 423.6          | 444.2          | 510.1          |
| <b>Irradiance (<math>\mu\text{W}/\text{cm}^2</math>)</b>                 | 92.2           | 107.5          | 118.4          |
| <b>Luminance (<math>\text{cd}/\text{m}^2</math>)</b>                     | 126.2          | 110.9          | 128.0          |
| <b>Log photon flux (<math>\log_{10} (1/\text{cm}^2/\text{s})</math>)</b> | 14.4           | 14.5           | 14.5           |

\* Photopic spectral sensitivity based on Nuboer et al., 1992 (ERG)

^ Photopic spectral sensitivity based on Prescott and Wathes, 1999 (Behavioural)

## Supplementary Figures

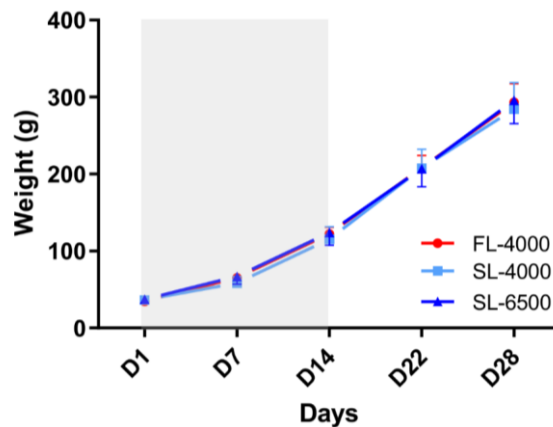

**Supplementary Figure S1.** Average weights of animals raised under FL-4000 (n = 18), SL-4000 (n=12) and SL-6500 (n = 9) throughout the experiment. Shaded area between D1 and D14 indicates the period of form-deprivation. Data are represented as average  $\pm$  SD. Body weights were not significantly different between groups, and were not affected by form-deprivation or recovery ( $P > 0.05$ ).

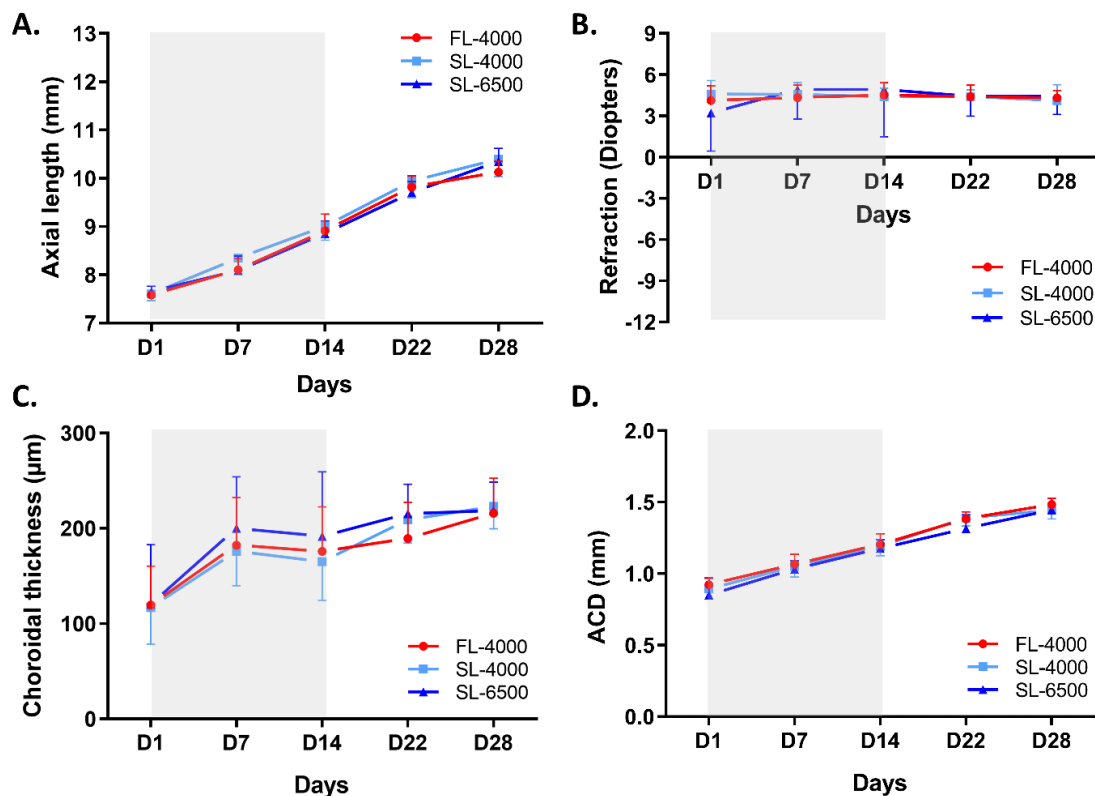

**Supplementary Figure S2.** Data from fellow control eyes in animals raised under FL 4000 (n=18), SL 4000 (n=12) and SL 6500 (n=9); axial length (A), refraction (B), choroidal thickness (C) and anterior chamber depth (ACD) (D). Data are represented as average  $\pm$  SD. Data from control eyes were compared between groups using a 2-way repeated-measures analysis of variance. Shaded area (D1-D14) indicates the period of form-deprivation. No statistical differences were found between groups ( $P > 0.05$ ).

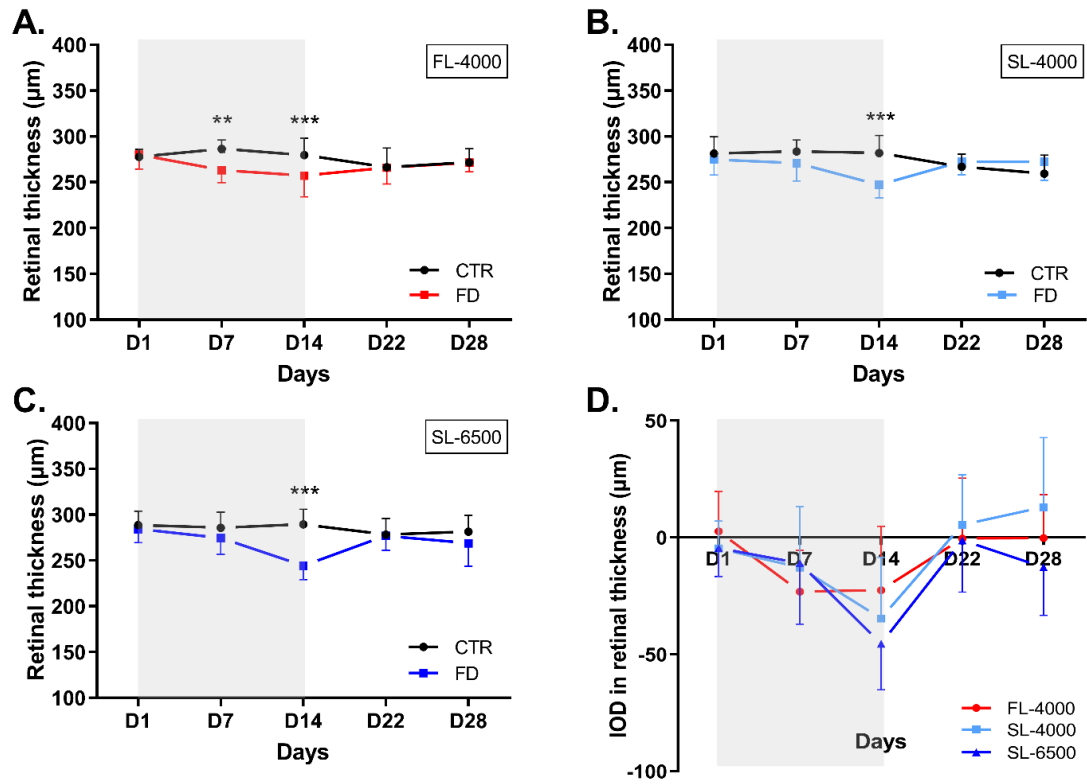

**Supplementary Figure S3.** Changes in the retinal thickness in FD and fellow control eyes in animals raised under FL-4000 ( $n = 18$ ) (A), SL-4000 ( $n = 12$ ) (B), SL-6500 ( $n = 9$ ) (C); and interocular differences (IOD: form-deprived eye – control eye) in retinal thickness in eyes exposed to FL-4000, SL-4000 and SL-6500 (D). CTR: Control; FD: Form-deprivation. Shaded area (D1-D14) indicates the period of form-deprivation. Data are represented as average  $\pm$  SD; \*\* ( $P < 0.01$ ), \*\*\* ( $P < 0.001$ ).

## **Supplementary References**

1. Nuboer JFW, Coemans MAJM, Vos JJ. Artificial lighting in poultry houses: Are photometric units appropriate for describing illumination intensities?, *Br Poult Sci.* 1992; 33:1, 135-140.
2. Prescott NB, Wathes CM. Spectral sensitivity of the domestic fowl (*Gallus g. domesticus*). *Br Poult Sci.* 1999; 40: 332-9.
